# Supplementary material for: Involvement of lipid rafts in the localization and dysfunction effect of the antitumor ether phospholipid edelfosine in mitochondria
Source: PubMed Central journal article supplement — Cell Death Dis. 2011 May 19;2(5):e158–. doi: 10.1038/cddis.2011.41 (PMC3122120; doi:10.1038/cddis.2011.41), 2011-05-19
Supplement: cddis201141x1.pdf [file cddis201141x1.pdf]

# **SUPPLEMENTARY INFORMATION**

## **Involvement of lipid rafts in the localization and dysfunction effect of the antitumor ether phospholipid edelfosine in mitochondria**

**Faustino Mollinedo<sup>1</sup>, Miriam Fernández<sup>2</sup>, Valentín Hornillos<sup>3</sup>, Javier Delgado<sup>3</sup>, Francisco Amat-Guerri<sup>3</sup>, A. Ulises Acuña<sup>4</sup>, Teresa Nieto-Miguel<sup>1</sup>, Janny A. Villa-Pulgarín<sup>1,5</sup>, Carmen González-García<sup>6</sup>, Valentín Ceña<sup>7,8</sup>, and Consuelo Gajate<sup>1</sup>**

<sup>1</sup>Instituto de Biología Molecular y Celular del Cáncer, Centro de Investigación del Cáncer, CSIC-Universidad de Salamanca, Campus Miguel de Unamuno, E-37007 Salamanca, Spain

<sup>2</sup>Laboratorio de Neurofisiología y Plasticidad Sináptica, Instituto de Investigación en Discapacidades Neurológicas (IDINE), Universidad de Castilla-La Mancha, E-02006 Albacete, Spain

<sup>3</sup>Instituto de Química Orgánica General, CSIC, Juan de la Cierva 3, E-28006 Madrid, Spain

<sup>4</sup>Instituto de Química Física Rocasolano, CSIC, Serrano 119, E-28006 Madrid, Spain

<sup>5</sup>Apointech, Centro Hispano-Luso de Investigaciones Agrarias (CIALE), Parque Científico de la Universidad de Salamanca, C/ Río Duero 12, E-37185 Villamayor, Salamanca, Spain

<sup>6</sup>Departamento de Ciencias Médicas, Facultad de Medicina, Universidad de Castilla-La Mancha, E-02006 Albacete, Spain

<sup>7</sup>Unidad Asociada “Neurodeath”, UCLM-CSIC, Universidad de Castilla-La Mancha, E-02006 Albacete, Spain

<sup>8</sup>CIBER de Enfermedades Neurodegenerativas. Instituto de Salud Carlos III, Sinesio Delgado 6, E-28029 Madrid, Spain

### **INDEX:**

#### **I - Materials and Methods**

#### **II - Synthesis of PTRI-ET**

#### **III - Synthesis of Et-BDP-ET**

#### **IV - Synthesis of Yn-BDP-ET**

## I - Materials and Methods

All reactions were carried out under argon atmosphere. Commercial reagents were used as received. Compounds 1-bromo-6-phenylhexa-1,3,5-triene (**1**, 3:7 *all-(E)*/(1*Z*,3*E*,5*E*) mixture), 5-methoxy-2-oct-7'-ynyl-[1,3]-dioxane (**2**, 1:3 *cis/trans* mixture), 2-(14'-phenyltetradeca-9',11',13'-trien-7'-ynyl)-5-methoxy-[1,3]-dioxane (**3**, corresponding mixture of isomers from the reaction **1** + **2**), *rac*-2-*O*-methylglycerol<sup>1</sup>, 3,5-dimethyl-4-ethyl-2-formyl-1*H*-pyrrole<sup>2</sup> and 2-iodo-1,3,5,7-tetramethyl-4,4-difluoro-4-bora-3a,4a-diaza-*s*-indacene<sup>3</sup> were prepared as described elsewhere. Solvents were purified by standard methods and deoxygenated by argon bubbling prior to use. Acetonitrile, chloroform, dichloromethane, DMF and THF were dried by passing through activated alumina columns in a PureSolv purification system. Yields refer to the isolated pure compound. Analytical thin layer chromatography (TLC) was carried out on precoated silica gel plates, Merck 60F254, 0.25 mm. Compounds were visualized with 254-nm irradiation and phosphomolybdic acid solution followed by heating, or by their fluorescence under 365-nm irradiation. Flash column chromatography was performed on silica gel, Merck 60, 230–400 mesh, 0.040–0.063 mm. High performance liquid chromatography (HPLC) was carried out with an HP Agilent 1100 chromatograph equipped with a 5- $\mu$ m C18 reverse phase column (4.6 $\times$ 150 mm) and a diode array detector, using as eluent MeOH–H<sub>2</sub>O 9:1 v/v with 10 mM H<sub>3</sub>PO<sub>4</sub> at a flow rate of 1.2 mL min<sup>-1</sup>, and detection at 346, 354, 375 and 529 nm. <sup>1</sup>H and <sup>13</sup>C NMR spectra were recorded on INOVA-300 or Bruker 300 spectrometers at room temperature, unless otherwise noted. Chemical shifts are reported in parts per million (ppm), using as internal reference the proton signal of the trace of non-deuterated solvent or the carbon signal of the solvent ( $\delta$  7.26 and 77.0, respectively, in the case of chloroform). Abbreviations: s (singlet), br. s (broad singlet), d (doublet), t (triplet), q (quartet), m (complex multiplet). Carbon and proton assignments were based on HSQC, HMBC and COSY. IR spectra (in cm<sup>-1</sup>) were recorded in Perkin-Elmer 681 and FT-Spectrum One spectrophotometers. Low resolution mass spectra were registered by electron impact (70 eV) in a Hewlett-Packard 5973 spectrometer in the direct-injection mode, and by electrospray in the positive mode in a Hewlett-Packard 1100 apparatus. High resolution mass spectra were determined in an AutoSpec Micromass (Waters) instrument, in the L-SIMS mode using Cs<sup>+</sup> (30 kV) in *m*-NBA matrix, with PEG as internal standard. UV-Vis absorption spectra were registered on Varian CARY-3E or Perkin-Elmer Lambda-2 spectrophotometers. Corrected fluorescence spectra were recorded in a PC1 ISS spectrofluorimeter. The fluorescence quantum yield ( $\Phi_f$ ) of the BDP analogues was determined by reference to that of the BDP dye PM567 in methanol ( $\Phi_f = 0.91$ )<sup>4</sup>, using the expression of Parker and Rees<sup>5</sup>.

Analogue PTE-ET was synthesized as described elsewhere.<sup>1</sup> Absorption and fluorescence spectra in DMSO solution are shown in Figure S1, panel A.

## II - Synthesis of PTRI-ET

This analogue was obtained from the cyclic acetal **3**, an intermediate product in the PTE-ET synthesis that resulted from the Sonogashira-Hagihara cross-coupling between **1** and **2** (Scheme S1). Acetal ring opening, selective precipitation of the *all-(E)* isomer **4** and introduction of the phosphocholine group at the terminal alcohol<sup>6</sup> yielded the target analogue.

**Scheme S1<sup>a</sup>**

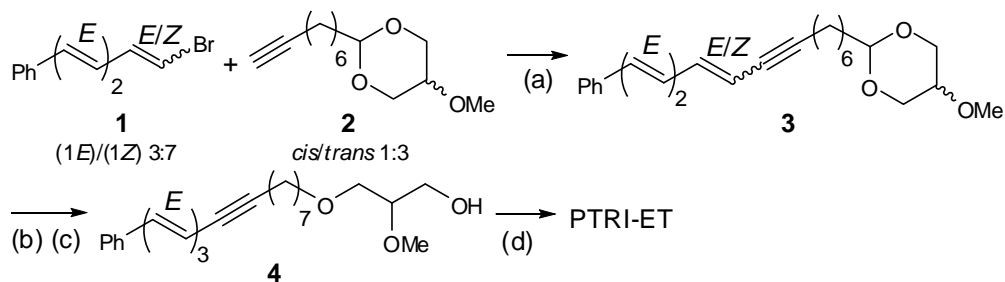

<sup>a</sup> Reagents and conditions: (a) **2**/**1** mole ratio = 1.3, Pd(PPh<sub>3</sub>)<sub>2</sub>Cl<sub>2</sub> (7.5 mol%), CuI (25 mol%), Et<sub>2</sub>NH, THF, Ar, room temp., 2 h, 90%; (b) DIBAL-H, MePh, Ar, 0 °C to room temp., 96%; (c) precipitation from CH<sub>2</sub>Cl<sub>2</sub> with *n*-pentane, 25%; (d) 2-chloro-1,3,2-dioxaphospholane-2-oxide, Me<sub>3</sub>N, MeCN, Ar, pressure tube, -78 °C to room temp., 3 h, 80 °C, 4 h, 35%.

*all*-(*E*)-3-*O*-(15'-Phenylpentadeca-10',12',14'-trien-8'-ynyl)-2-*O*-methyl-*rac*-glycerol (**4**):

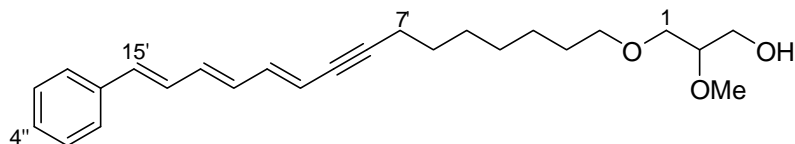

DIBAL-H (3 mL, 1 M in toluene) was added (0 °C, argon, stirring) to the acetal **3** (isomer mixture) (53 mg, 0.14 mmol). After 4 h at room temperature, a saturated aqueous solution of NH<sub>4</sub>Cl was added at 0 °C, until no gas evolution was observed. Subsequent workup and purification by column chromatography (silica gel, hexane:EtOAc, 2:1 v/v) yielded a yellow waxy solid (yield 50 mg, 96%) from which the *all*-(*E*) alcohol **4** was isolated by precipitation from a saturated solution in CH<sub>2</sub>Cl<sub>2</sub> with *n*-pentane. Yield 12.5 mg, 25%. TLC (hexane:EtOAc, 2:1): *R*<sub>f</sub> = 0.27. <sup>1</sup>H NMR (300 MHz, CDCl<sub>3</sub>, 30 °C): δ 1.20–1.45 (m, 6H, H-3', H-4', H-5), 1.46–1.66 (m, 4H, H-2', H-6'), 2.24 (m, 1H, OH), 2.35 (td, 2H, *J* = 6.9 and 2.1 Hz, H-7'), 3.40–3.47 (m, 3H, H-1', H-2), 3.47 (s, 3H, OCH<sub>3</sub>), 3.54 (m, 2H, H-1), 3.60–3.85 (m, 2H, H-3), 5.63 (dt, 1 H, *J* = 15.6 and 2.1 Hz, H-10'), 6.32 (dd, 1H, *J* = 14.4 and 10.4 Hz, H-12'), 6.39 (dd, 1H, *J* = 14.4 and 10.4 Hz, H-13'), 6.58 (d, 1 H, *J* = 15.3 Hz, H-15'), 6.59 (dd, 1H, *J* = 15.3 and 10.2 Hz, H-11'), 6.80 (dd, 1H, *J* = 15.3 and 9.6 Hz, H-14'), 7.21 (t, 1 H, *J* = 7.5 Hz, H-4''), 7.31 (t, 2H, *J* = 7.5 Hz, H-3'', H-5''), 7.39 (d, 1 H, *J* = 7.5 Hz, H-2'', H-6''); <sup>13</sup>C NMR (75 MHz, CDCl<sub>3</sub>, 30 °C): δ 19.7 (C-7'), 25.9 (C-3'), 28.6 (C-4'), 28.8 (C-5'), 28.9 (C-6'), 29.5 (C-2'), 57.7 (OCH<sub>3</sub>), 62.6 (C-1), 70.6 (C-3), 71.8 (C-1'), 79.8 (C-2), 80.3 (C-9'), 94.5 (C-8'), 112.0 (C-10'), 126.4 (C-2'', C-6''), 127.7 (C-4''), 128.6 (C-3'', C-5''), 128.7 (C-14'), 132.5 (C-12'), 133.6 (C-15'), 134.2 (C-13'), 137.1 (C-1''), 140.5 (C-11'); FT IR (KBr) *v*<sub>max</sub>: 3414, 3020, 2930, 2852, 1600, 1463, 1002, 747, 689 cm<sup>-1</sup>; EI MS (70 eV), *m/z* (%): 382 (20) [M<sup>+</sup>], 219 (5), 205 (14), 193 (36), 179 (58), 165 (36), 152 (13), 141 (20), 129 (30), 117 (51), 105 (22), 91 (100); UV-Vis (MeOH): λ<sub>max</sub> (nm): 354, 337 (max.), 322.

*all-(E)*-1-*O*-(15'-Phenylpentadeca-10',12',14'-trien-8'-ynyl)-2-*O*-methyl-*rac*-glycero-3-phosphocholine (PTRI-ET)

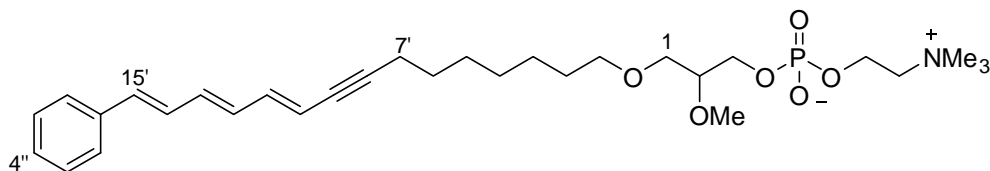

Trimethylamine (ca. 2 mL) was condensed into a solution of alcohol **4** (60 mg, 0.16 mmol) in acetonitrile (10 mL) in a pressure tube at  $-78\text{ }^{\circ}\text{C}$  under argon. 2-Chloro-1,3,2-dioxaphospholane-2-oxide (120  $\mu\text{L}$ , 1.3 mmol) was then added to the cooled solution and the reactor was closed and left 3 h at room temperature with stirring and 4 h at  $80\text{ }^{\circ}\text{C}$ . After cooling back to room temperature, the reactor was opened, the solvent and the excess trimethylamine were vacuum-evaporated, the residual solid was dissolved in THF:H<sub>2</sub>O 9:1 v/v (10 mL), and Amberlite MB-3 was added until change of color of the resin (saturation). The mixture was filtered, the resin was washed with MeOH (3 $\times$ 10 mL), the filtrate and washings were collected, the solvent was vacuum-evaporated, and the residual solid was purified by column chromatography (silica gel), using first CHCl<sub>3</sub>:MeOH, 9:1 v/v, for separating non-polar products, and then CHCl<sub>3</sub>:MeOH:H<sub>2</sub>O, 65:25:5 v/v/v. The solid isolated from the chromatography was purified by precipitation with *n*-pentane from a saturated solution in CH<sub>2</sub>Cl<sub>2</sub>. Yellow waxy solid, stable for months at  $-20\text{ }^{\circ}\text{C}$  in the dark; yield 20 mg, 35%; TLC (MeOH:H<sub>2</sub>O 9:1):  $R_f = 0.20$ ; <sup>1</sup>H NMR (300 MHz, CDCl<sub>3</sub>, 30  $^{\circ}\text{C}$ ):  $\delta$  1.20–1.40 (m, 8H, H-3' to H-6'), 1.52 (m, 2H, H-2'), 2.10 (m, 2H, H-7'), 3.34 (s, 9H, N(CH<sub>3</sub>)<sub>3</sub>), 3.80 (m, 2H, CH<sub>2</sub>N), 3.43 (s, 3H, OCH<sub>3</sub>), 3.64–4.00 (m, 7H, H-1, H-2, H-3, H-1'), 4.30 (br. s, 2H, POCH<sub>2</sub>CH<sub>2</sub>N), 5.63 (d, 1H,  $J = 15.5$  Hz, H-10'), 6.34 (dd, 1H,  $J = 14.7$  and 10.1 Hz, H-12'), 6.44 (dd, 1H,  $J = 14.7$  and 9.9 Hz, H-13'), 6.57 (dd, 1H,  $J = 15.5$  and 9.9 Hz, H-11'), 6.58 (d, 1H,  $J = 15.5$  Hz, H-15'), 6.80 (dd, 1H,  $J = 15.5$  and 9.9 Hz, H-14'), 7.20 (t, 1H,  $J = 7.5$  Hz, H-4''), 7.27 (t, 2H,  $J = 7.5$  Hz, H-3'', H-5''), 7.38 (d, 2H,  $J = 7.5$  Hz, H-2'', H-6''); <sup>13</sup>C NMR (75 MHz, CDCl<sub>3</sub>, 30  $^{\circ}\text{C}$ ):  $\delta$  19.0 (C-7'), 26.0 (C-3'), 28.7, 28.9, 29.0, 29.7 (C-2', C-4', C-5', C-6'), 54.3 [N(CH<sub>3</sub>)<sub>3</sub>], 57.8 (OCH<sub>3</sub>), 59.3 (d,  $J = 5.5$  Hz, C-1), 64.9 (d,  $J = 4.4$  Hz, CH<sub>2</sub>N), 66.3 (d,  $J = 5.5$  Hz, OCH<sub>2</sub>CH<sub>2</sub>N), 71.7 (C-3), 70.3 (C-1'), 79.6 (d,  $J = 7.7$  Hz, C-2), 80.4 (C-9'), 94.6 (C-8'), 112.1 (C-10'), 126.4 (C-2'', C-6''), 127.7 (C-4''), 128.6 (C-3'', C-5''), 128.7 (C-14'), 132.5 (C-12'), 133.7 (C-15'), 134.3 (C-13'), 137.2 (C-1''), 140.5 (C-11''); ESI<sup>+</sup> MS: 548.3 [M + H<sup>+</sup>]; HR MS (L-SIMS): calc. for (C<sub>30</sub>H<sub>48</sub>NO<sub>6</sub>P)H<sup>+</sup> 548.3141. Found 548.3155; FT IR (KBr)  $\nu_{\text{max}}$ : 3391, 3021, 2929, 2855, 2100, 1660, 1464, 1235, 1089, 994, 969, 923, 802, 748, 690  $\text{cm}^{-1}$ ; UV-Vis (DMSO)  $\lambda_{\text{max}}$  (nm) ( $\epsilon$ , M<sup>-1</sup> cm<sup>-1</sup>): 329 (43000), 345 (62000), 363 (51000); emission (corrected) (DMSO)  $\lambda_{\text{max}}$ : 423, 446 nm (Figure S2, panel B).

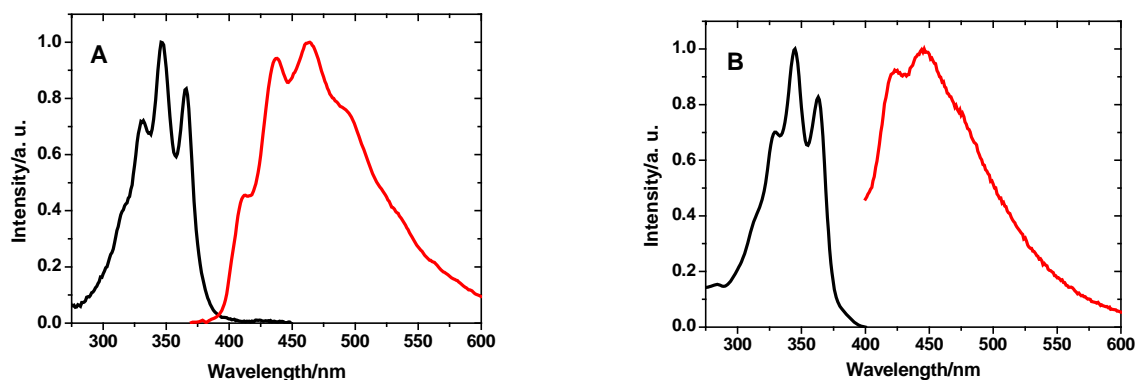

**Figure S1.** Absorption and corrected fluorescence spectra (normalized) of the phenylpolyene analogues of edelfosine  $1-2 \times 10^{-6}$  M in DMSO,  $\lambda_{\text{exc}} = 365 \pm 2$  nm. A) PTE-ET; B) PTRI-ET.

### III - Synthesis of Et-BDP-ET

The analogue was prepared in seven steps (Scheme S2): a) the reaction of 10-bromoundecanal (**5**) with *rac*-2-*O*-methylglycerol provided the cyclic acetal **6** as a *cis/trans* mixture (yields 25% and 68%, respectively), using conditions described elsewhere for the synthesis of similar acetals<sup>1</sup>; b) the cleavage of **6** with DIBAL-H yielded the disubstituted glycerol **7**<sup>1,7</sup>; c) the reaction of **7** with acetylacetone produced the alkylated 1,3-diketone **8**<sup>8</sup>; d) the  $\alpha$ -benzyloxycarbonyl pyrrole **9** was prepared from **8**, benzyl acetoacetate, sodium nitrite and zinc, under Johnson-modified Knorr conditions<sup>9</sup>; e) the elimination of the benzyloxycarbonyl group in **9** by hydrogenolysis/decarboxylation<sup>10</sup> yielded the  $\alpha$ -H pyrrole **10**; f) the asymmetric BDP compound **11** was prepared by condensing 3,5-dimethyl-4-ethyl-2-formyl-1*H*-pyrrole with **10**, and subsequent treatment of the dipyrromethene thus obtained with boron trifluoride diethyl etherate<sup>11</sup>; g) finally, the phosphocholine group was introduced by reaction with 2-chloro-1,3,2-dioxaphospholane-2-oxide and trimethylamine<sup>12</sup>, to yield analogue Et-BDP-ET.

#### Scheme S2<sup>a</sup>

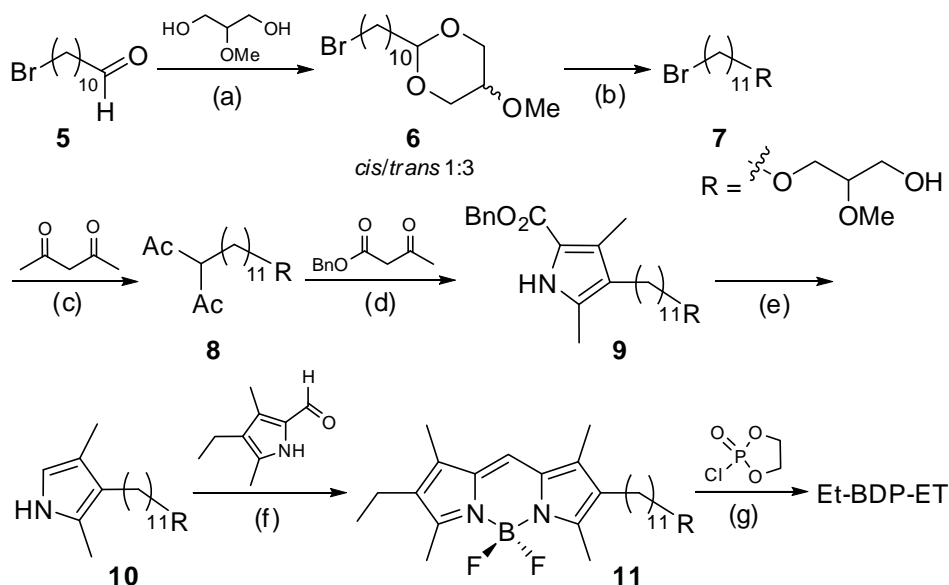

<sup>a</sup> Reagents and conditions: (a) *rac*-2-*O*-methylglycerol/**5** molar ratio = 1.3, *p*TsOH, MePh, reflux, 14 h, 93%; (b) DIBAL-H, MePh, 0 °C, then room temp., 24 h, 85%; (c) acetylacetone/**7** molar ratio = 10, K<sub>2</sub>CO<sub>3</sub>, 18-crown-6, acetone, reflux, 24 h, 70%; (d) benzyl acetoacetate, NaNO<sub>2</sub>, H<sub>2</sub>O, AcOH, 5 °C, 3 h, then room temp., 14 h, add **8** (molar ratio benzyl acetoacetate/**8** = 1.0) and Zn dust, 65 °C, 1 h, 30%; (e) H<sub>2</sub>, Pd/C, EtOH, 40 psi, 4 h, filtration and solvent elimination, then TFA, Ar, 24%; (f) 3,5-dimethyl-4-ethyl-2-formyl-1*H*-pyrrole/**10** molar ratio = 1.0, POCl<sub>3</sub>, CH<sub>2</sub>Cl<sub>2</sub>, Ar, room temp., 5 h, then DIPEA, BF<sub>3</sub>.OEt<sub>2</sub>, 20 min, 50%; (g) 2-chloro-1,3,2-dioxaphospholane-2-oxide/**11** molar ratio = 2.0, Me<sub>3</sub>N, MeCN, Ar, pressure tube, -78 °C to room temperature, 3 h, then 80 °C, 4 h, 65%.

5-Methoxy-2-(10'-bromodecyl)-[1,3]-dioxane (**6**) (1:3 *cis/trans* mixture):

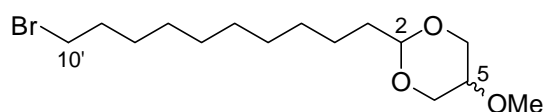

A solution of 11-bromoundecanal (**5**) (4.71 g, 18.9 mmol), *rac*-2-*O*-methylglycerol (2.60 g, 24.6 mmol), and *p*-toluenesulfonic acid (108 mg, 0.57 mmol) in toluene (200 mL) was refluxed for 14 h. After workup, isomers *cis*-**6** and *trans*-**6** were separated by column chromatography (silica gel, hexane:EtOAc, 4:1 v/v). Data of *cis*-**6**: colorless oil, yield 1.58 g, 25%; TLC (hexane:EtOAc 4:1 v/v): *R*<sub>f</sub> = 0.40; <sup>1</sup>H NMR (300 MHz, CDCl<sub>3</sub>): δ 1.20–1.45 (m, 14H, H-2' to H-8'), 1.63 (m, 2H, H-1'), 1.83 (q, *J* = 7.0 Hz, 2H, H-9'), 3.05 (m, 1H, H-5), 3.39 (t, *J* = 6.9 Hz, 2H, H-10'), 3.42 (s, 3H, CH<sub>3</sub>), 3.79 (dd, *J* = 12.6 and 1.4 Hz, 2H, H-4<sub>ax</sub>, H-6<sub>ax</sub>), 4.19 (dd, *J* = 12.6 and 1.4 Hz, 2H, H-4<sub>eq</sub>, H-6<sub>eq</sub>), 4.53 (t, *J* = 5.4 Hz, 1H, H-2); <sup>13</sup>C NMR (75 MHz, CDCl<sub>3</sub>): δ 23.9, 28.1, 28.7, 29.3 (C-2' to C-8'), 32.8 (C-9'), 34.0 (C-10'), 34.8 (C-1'), 56.5 (OCH<sub>3</sub>), 68.0 (C-4, C-6), 72.4 (C-5), 102.4 (C-2); FT IR (KBr) *v*<sub>max</sub>: 2976, 2922, 2851, 2819, 1469, 1437, 1407, 1347, 1287, 1248, 1153, 1108, 1082, 1001, 956, 942, 904, 777 cm<sup>-1</sup>; EI MS, *m/z* (%): 117 (100) [M – C<sub>10</sub>H<sub>20</sub>Br] (M: nominal mass). Data of *trans*-**6**: white solid, yield 4.30 g, 68%; TLC (hexane:EtOAc, 4:1 v/v): *R*<sub>f</sub> = 0.90; <sup>1</sup>H NMR (300 MHz, CDCl<sub>3</sub>): δ 1.21–1.45 (m, 14H, H-2' to H-8'), 1.58 (m, 2H, H-1'), 1.84 (q, *J* = 7.0 Hz, 2H, H-9'), 3.30–3.44 (m, 5H, H-4<sub>ax</sub>, H-5, H-6<sub>ax</sub>, H-10'), 3.37 (s, 3H, CH<sub>3</sub>), 4.24 (dd, *J* = 10.4 Hz, *J* = 4.3 Hz, 2H, H-4<sub>eq</sub>, H-6<sub>eq</sub>), 4.38 (t, *J* = 5.1 Hz, 1H, H-2); <sup>13</sup>C-RMN (75 MHz, CDCl<sub>3</sub>): δ 24.1, 28.1, 28.7, 29.4 (C-2' to C-8'), 32.8 (C-9'), 34.0 (C-10'), 34.4 (C-1'), 57.2 (CH<sub>3</sub>), 69.5 (C-4, C-6), 69.8 (C-5), 102.2 (C-2); FT IR (KBr) *v*<sub>max</sub>: 2979, 2923, 2850, 1633, 1462, 1408, 1281, 1252, 1199, 1149, 1131, 1108, 1035, 960 cm<sup>-1</sup>; EI MS, *m/z* (%): 117 (100) [M – C<sub>10</sub>H<sub>20</sub>Br] (M: nominal mass).

1-*O*-(11'-Bromoundecyl)-2-*O*-methyl-*rac*-glycerol (**7**):

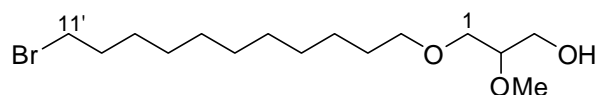

DIBAL-H (42 mL, 1 M in toluene) was added (0 °C, argon, stirring) to the acetal **6** (isomer *cis*, *trans* or mixtures) (2.83 g, 8.39 mmol). After 24 h at room temperature, a saturated aqueous solution of NH<sub>4</sub>Cl

was added at 0 °C, until no gas evolution was observed. The subsequent workup and purification by column chromatography (silica gel, hexane:EtOAc, 1:1 v/v) yielded alcohol **7** as a colorless oil, yield 2.42 g, 85%; TLC (hexane:EtOAc, 1:1 v/v):  $R_f = 0.40$ ;  $^1\text{H NMR}$  (300 MHz,  $\text{CDCl}_3$ ):  $\delta$  1.22–1.36 (m, 12H, H-3' to H-8'), 1.41 (m, 2H, H-9'), 1.56 (m, 2H, H-2'), 1.84 (q,  $J = 7.1$  Hz, 2H, H-10'), 2.25 (dd,  $J = 6.7$  and 5.6 Hz, 1H, OH), 3.39 (t,  $J = 6.8$  Hz, 2H, H-11'), 3.41–3.48 (m, 3H, H-2, H-1'), 3.46 (s, 3H,  $\text{CH}_3$ ), 3.53 (m, 2H, H-1), 3.64 (m, 1H, H-3a), 3.74 (m, 1H, H-3b);  $^{13}\text{C NMR}$  (75 MHz,  $\text{CDCl}_3$ ):  $\delta$  28.1 (C-9'), 26.0, 28.7, 29.4, 29.4, 29.5, 29.6 (C-2' to C-8'), 32.8 (C-10'), 34.0 (C-11'), 57.7 ( $\text{CH}_3$ ), 62.6 (C-3), 70.6 (C-1), 71.9 (C-1'), 79.9 (C-2); FT IR (KBr)  $\nu_{\text{max}}$ : 3436, 2928, 2855, 1649, 1464, 1119, 1089  $\text{cm}^{-1}$ ;  $\text{ESI}^+$  MS,  $m/z$ : 339.0 [ $\text{M} + \text{H}^+$ ], 361.0 [ $\text{M} + \text{Na}^+$ ] (M: nominal mass).

1-*O*-(12',12'-Diacetyldodecyl)-2-*O*-methyl-*rac*-glycerol (**8**):

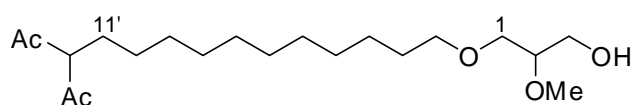

A mixture of the glycerol **7** (2.42 g, 7.13 mmol), acetylacetone (7.21 g, 71.30 mmol),  $\text{K}_2\text{CO}_3$  (4.93 g, 35.65 mmol) and 18-crown-6 (57 mg, 0.21 mmol) in acetone (50 mL) was refluxed for 24 h. After filtration of the non-dissolved material, the solvent was removed under reduced pressure and the residue was purified by column chromatography (silica gel, hexane:EtOAc, 1:1 v/v). Colorless oil, yield 1.79 g, 70%; TLC (hexane:EtOAc, 1:4 v/v):  $R_f = 0.35$ ;  $^1\text{H NMR}$  (300 MHz,  $\text{CDCl}_3$ ):  $\delta$  1.22–1.41 (m, 16H, H-3' to H-10'), 1.55 (m, 2H, H-2'), 1.69 (m, 2H, H-11'), 2.13 and 2.26 (two s, each 3H,  $2 \times \text{CH}_3\text{CO}$ ), 3.39–3.48 (m, 3H, H-2, H-1'), 3.45 (s, 3H,  $\text{CH}_3\text{O}$ ), 3.52 (m, 2H, H-1), 3.64 (m, 1H, H-3a), 3.74 (m, 1H, H-3b), 3.74 (t,  $J = 6.5$  Hz, 1H, H-12');  $^{13}\text{C NMR}$  (75 MHz,  $\text{CDCl}_3$ ):  $\delta$  19.8 ( $\text{CH}_3\text{CO}$ ), 25.9 (C-10'), 28.6 (C-11'), 26.0, 29.2, 29.4, 29.4, 29.5, 29.5 (C-2' to C-9'), 31.9 ( $\text{CH}_3\text{CO}$ ), 57.7 ( $\text{CH}_3\text{O}$ ), 62.6 (C-3), 68.2 (C-12'), 70.6 (C-1), 71.9 (C-1'), 79.8 (C-2), 197.0 ( $2 \times \text{CO}$ ); FT IR (neat)  $\nu_{\text{max}}$ : 3436, 2928, 2850, 1679, 1583, 1461, 1402, 1359, 1275, 1169, 1117, 954  $\text{cm}^{-1}$ ;  $\text{ESI}^+$  MS,  $m/z$ : 359.2 [ $\text{M} + \text{H}^+$ ], 381.2 [ $\text{M} + \text{Na}^+$ ].

1-*O*-[11'-(2''-Benzyloxycarbonyl-3'',5''-dimethyl-1*H*-pyrrol-4''-yl)undecyl]-2-*O*-methyl-*rac*-glycerol (**9**):

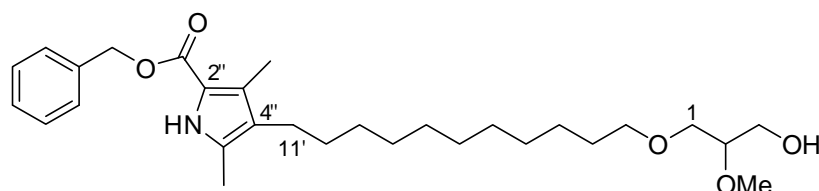

A solution of  $\text{NaNO}_2$  (344 mg, 4.98 mmol) in water (2 mL) was added with stirring to an ice-cooled solution of benzyl acetoacetate (960 mg, 4.98 mmol) in acetic acid (8 mL). After stirring at 5 °C for 3 h and at room temperature for 14 h, diacetylalcohol **8** was added (1.788 g, 4.98 mmol). Then, Zn dust (648 mg, 9.91 mmol) was slowly added and the mixture was kept at 65 °C for 1 h. The subsequent workup and purification by column chromatography (silica gel, hexane:EtOAc, 1:1 v/v v/v) allowed the separation of pyrrole **9** as a yellow oil, yield 720 mg, 30%; TLC (hexane:EtOAc, 1:1 v/v):  $R_f = 0.50$ ;  $^1\text{H NMR}$  (300 MHz,  $\text{CDCl}_3$ ):  $\delta$  1.19–1.40 (m, 16H, H-3' to H-10'), 1.55 (m, 2H, H-2'), 2.16, 2.26 (two s, each 3H,  $\text{CH}_3$ -

C3", CH<sub>3</sub>-C5"), 2.31 (t, *J* = 7.4 Hz, 2H, H-11'), 3.37–3.49 (m, 3H, H-2, H-1'), 3.44 (s, 3H, CH<sub>3</sub>O), 3.52 (m, 2H, H-1), 3.62 (dd, *J* = 11.4 and 4.9 Hz, 1H, H-3a), 3.74 (dd, *J* = 11.4 and 3.9 Hz, 1H, H-3b), 5.27 (s, 2H, CH<sub>2</sub>Ph), 7.36 (m, 5H, H-Ph), 8.84 (br. s, 1H, NH); <sup>13</sup>C NMR (75 MHz, CDCl<sub>3</sub>): δ 10.7 (CH<sub>3</sub>-pyrrole), 11.4 (CH<sub>3</sub>-pyrrole), 23.9 (C-11'), 29.3–29.5 and 30.8 (C-2' to C-10'), 57.7 (CH<sub>3</sub>O), 62.5 (C-3), 65.2 (CH<sub>2</sub>Ph), 70.5 (C-1), 71.8 (C-1'), 79.9 (C-2), 116.2 (C-2"), 122.5 (C-4"), 127.9, 127.9, 128.4 (C<sub>o</sub>, C<sub>m</sub>, C<sub>p</sub>, C-3"), 129.9 (C-5"), 136.6 (C<sub>i</sub>), 161.3 (CO<sub>2</sub>Bn); FT IR (neat)  $\nu_{\max}$ : 3319, 2928, 2850, 1740, 1682, 1667, 1502, 1440, 1365, 1264, 1116, 1088 cm<sup>-1</sup>; ESI<sup>+</sup> MS, *m/z*: 488.4 [M + H<sup>+</sup>], 510.3 [M + Na<sup>+</sup>].

1-*O*-[11'-(2",4"-Dimethyl-1*H*-pyrrol-3"-yl)undecyl-2-*O*-methyl-*rac*-glycerol (**10**):

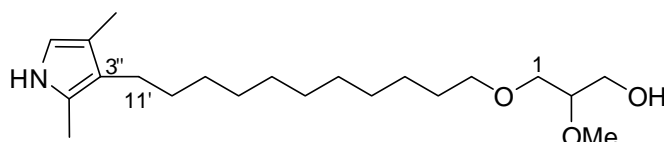

A stirred mixture of **9** (1.24 g, 2.54 mmol), EtOH (30 mL) and Pd/C 10% (130 mg) was hydrogenated at 40 psi for 4 h. After filtration, the solvent was removed and the residue was treated with TFA (1.5 mL) for 5 min. Then, argon was bubbled until dryness and the residue was dissolved in CH<sub>2</sub>Cl<sub>2</sub> (50 mL); the solution thus obtained was washed successively with water, saturated aqueous solution of NaHCO<sub>3</sub> and water. After drying with sodium sulfate, the solvent was removed and the residue was purified by column chromatography (silica gel, hexane:EtOAc, 4:1 v/v). The  $\alpha$ -H pyrrole **10** was a colorless oil that slowly darkens on standing; yield 201 mg, 24%; TLC (hexane:EtOAc, 1:1 v/v): *R<sub>f</sub>* = 0.55; <sup>1</sup>H NMR (300 MHz, CDCl<sub>3</sub>): δ 1.20–1.44 (m, 16H, H-3' to H-10'), 1.55 (m, 2H, H-2'), 2.07, 2.14 (two s, each 3H, CH<sub>3</sub>-C3", CH<sub>3</sub>-C5"), 2.33 (t, *J* = 7.4 Hz, 2H, H-11'), 3.39–3.49 (m, 3H, H-2, H-1'), 3.45 (s, 3H, CH<sub>3</sub>O), 3.53 (m, 2H, H-1), 3.63 (dd, *J* = 12.1 and 4.7 Hz, 1H, H-3a), 3.74 (dd, *J* = 11.5 and 4.1 Hz, 1H, H-3b), 6.36 (s, 1H, H-5"), 7.60 (br. s, 1H, NH); <sup>13</sup>C NMR (75 MHz, CDCl<sub>3</sub>): δ 10.4 (CH<sub>3</sub>-pyrrole), 11.3 (CH<sub>3</sub>-pyrrole), 24.3 (C-11'), 29.3–29.5, 31.1 (C-2' to C-10'), 57.7 (CH<sub>3</sub>O), 62.6 (C-3), 70.5 (C-1), 71.9 (C-1'), 80.0 (C-2), 112.6 (C-5"), 117.9, 119.0, 123.5 (C-2" to C-4"); FT IR (neat)  $\nu_{\max}$ : 3400, 2927, 2855, 1741, 1695, 1464, 1367, 1240, 1118, 1047 cm<sup>-1</sup>; ESI<sup>+</sup> MS, *m/z*: 354.2 [M + H<sup>+</sup>], 392.3 [M + K<sup>+</sup>].

1-*O*-[11'-(6"-Ethyl-1",3",5",7"-tetramethyl-4",4"-difluoro-4"-bora-3a",4a"-diazas-indacen-2"-yl)undecyl]-2-*O*-methyl-*rac*-glycerol (**11**):

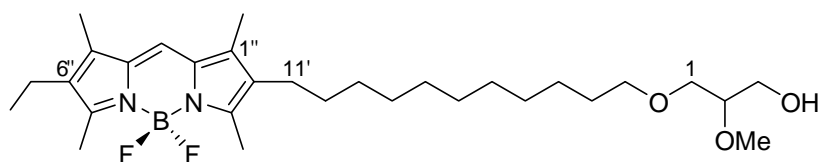

Phosphorus oxychloride (87 mg, 53  $\mu$ L, 0.57 mmol) was added to a stirred solution of pyrrole **10** (200 mg, 0.57 mmol) and 3,5-dimethyl-4-ethyl-2-formyl-1*H*-pyrrole (86 mg, 0.57 mmol) in CH<sub>2</sub>Cl<sub>2</sub> (150 mL) under argon atmosphere. After stirring the mixture at room temperature for 5 h, diisopropylethylamine (DIPEA) (366 mg, 493  $\mu$ L, 2.83 mmol) was added and 5 min later BF<sub>3</sub>.OEt<sub>2</sub> (402 mg, 356  $\mu$ L, 2.83



mmol). After 5 min, the same amount of DIPEA and  $\text{BF}_3 \cdot \text{OEt}_2$  was added and the mixture was stirred for 20 min. The workup allowed the isolation of a crude product that was purified by column chromatography (silica gel, hexane:EtOAc, 7:3 v/v). Red waxy solid, yield 151 mg, 50%; TLC (hexane:EtOAc, 1:1 v/v):  $R_f = 0.60$ ;  $^1\text{H NMR}$  (300 MHz,  $\text{CDCl}_3$ ):  $\delta$  1.05 (t,  $J = 7.6$  Hz, 3H,  $\text{CH}_2\text{CH}_3$ ), 1.22–1.36 (m, 14H, H-3' to H-9'), 1.40 (m, 2H, H-10'), 1.55 (q,  $J = 6.7$  Hz, 2H, H-2'), 2.14, 2.15 (two s, each 3H,  $\text{CH}_3\text{-C1''}$ ,  $\text{CH}_3\text{-C7''}$ ), 2.35 (m, 4H, H-11',  $\text{CH}_2\text{CH}_3$ ), 2.47 (two s, each 3H,  $\text{CH}_3\text{-C3''}$ ,  $\text{CH}_3\text{-C5''}$ ), 3.40–3.48 (m, 3H, H-2, H-1'), 3.45 (s, 3H,  $\text{CH}_3\text{O}$ ), 3.53 (m, 2H, H-1), 3.63 (dd,  $J = 11.6$  and 5.2 Hz, 1H, H-3a), 3.74 (dd,  $J = 11.6$  and 4.2 Hz, 1H, H-3b), 6.93 (s, 1H,  $\text{CH-8''}$ );  $^{13}\text{C NMR}$  (75 MHz,  $\text{CDCl}_3$ ):  $\delta$  9.3, 9.5 ( $\text{CH}_3\text{-C1''}$ ,  $\text{CH}_3\text{-C7''}$ ), 12.5, 12.6 ( $\text{CH}_3\text{-C3''}$ ,  $\text{CH}_3\text{-C5''}$ ), 14.5 ( $\text{CH}_2\text{CH}_3$ ), 17.2 ( $\text{CH}_2\text{CH}_3$ ), 24.0 (C-11'), 26.0, 29.4–29.5 (C-2' to C-9'), 30.1 (C-10'), 57.7 ( $\text{CH}_3\text{O}$ ), 62.6 (C-3), 70.5 (C-1), 71.8 (C-1'), 79.8 (C-2), 118.5 (C-8''), 130.2, 131.5, 132.4, 136.5, 136.9 (C-1'', C-7'', C-7a'', C-8a'', C-2'', C-6''), 154.5, 154.9 (C-3'', C-5''); FT IR (neat)  $\nu_{\text{max}}$ : 3394, 2925, 2850, 1604, 1471, 1226, 1191, 1069, 976  $\text{cm}^{-1}$ ;  $\text{ESI}^+$  MS,  $m/z$ : 515.3  $[\text{M} - \text{F}]^+$ , 495.5  $[\text{M} - 2\text{F} + \text{H}]^+$ ; HPLC (reverse phase  $\text{C}_{18}$  column, MeOH: $\text{H}_2\text{O}$ , 9:1 v/v, 1.2 mL  $\text{min}^{-1}$ ,  $\lambda_{\text{anal}}$  375 and 529 nm),  $R_t = 10.18$  min (98% purity).

1-*O*-[11'-(6''-Ethyl-1'',3'',5'',7''-tetramethyl-4'',4''-difluoro-4''-bora-3a'',4a''-diazas-indacen-2''-yl)undecyl]-2-*O*-methyl-*rac*-glycero-3-phosphocholine (Et-BDP-ET):

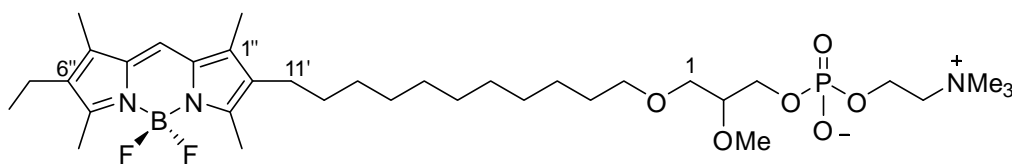

Trimethylamine (ca. 2 mL) was condensed into a solution of alcohol **11** (81 mg, 0.15 mmol) in acetonitrile (10 mL) in a pressure tube at  $-78$  °C under argon. 2-Chloro-1,3,2-dioxaphospholane-2-oxide (28  $\mu\text{L}$ , 0.30 mmol) was then added to the cooled solution and the reactor was closed and left 3 h at room temperature and 4 h at 80 °C. After cooling back to room temperature, the reactor was opened, the solvent and the excess trimethylamine were vacuum-evaporated, the residual solid was dissolved in THF: $\text{H}_2\text{O}$  9:1 v/v (10 mL), and Amberlite MB-3 was added until change of color of the resin (saturation). The mixture was filtered, the resin was washed with MeOH (3 $\times$ 10 mL), the filtrate and washings were collected, the solvent was vacuum-evaporated, and the residual solid was purified by column chromatography (silica gel), using first  $\text{CHCl}_3$ :MeOH, 9:1 v/v, for separating non-polar products, and then  $\text{CHCl}_3$ :MeOH: $\text{H}_2\text{O}$ , 65:25:5 v/v/v. Waxy oil, yield 70 mg, 65%; TLC ( $\text{CHCl}_3$ :MeOH: $\text{H}_2\text{O}$ , 65:25:5 v/v/v):  $R_f = 0.20$ ;  $^1\text{H NMR}$  (300 MHz,  $\text{CD}_3\text{OD}$ ):  $\delta$  1.06 (t,  $J = 7.6$  Hz, 3H,  $\text{CH}_2\text{CH}_3$ ), 1.25–1.37 (m, 14H, H-3' to H-9'), 1.41 (m, 2H, H-10'), 1.54 (q,  $J = 6.7$  Hz, 2H, H-2'), 2.15, 2.16 (two s, each 3H,  $\text{CH}_3\text{-C1''}$ ,  $\text{CH}_3\text{-C7''}$ ), 2.39 (m, 4H, H-11',  $\text{CH}_2\text{CH}_3$ ), 2.41, 2.42 (two s, each 3H,  $\text{CH}_3\text{-C3''}$ ,  $\text{CH}_3\text{-C5''}$ ), 3.22 (s, 9H,  $\text{N}(\text{CH}_3)_3$ ), 3.45 (s, 3H,  $\text{CH}_3\text{O}$ ), 3.41–3.59 (m, 6H, H-1, H-2, H-1'), 3.63 (m, 2H,  $\text{CH}_2\text{N}$ ), 3.85–4.01 (m, 2H, H-3), 4.27 (m, 2H,  $\text{OCH}_2\text{CH}_2\text{N}$ ), 7.20 (s, 1H,  $\text{CH-8''}$ );  $^{13}\text{C NMR}$  (75 MHz,  $\text{CD}_3\text{OD}$ ):  $\delta$  9.4, 9.6 ( $\text{CH}_3\text{-C1''}$ ,  $\text{CH}_3\text{-C7''}$ ), 12.7, 12.9 ( $\text{CH}_3\text{-C3''}$ ,  $\text{CH}_3\text{-C5''}$ ), 15.0 ( $\text{CH}_2\text{CH}_3$ ), 18.1 ( $\text{CH}_2\text{CH}_3$ ), 24.8 (C-11'), 27.3, 30.5–30.8 (C-2' to C-9'), 31.3 (C-10'), 54.67, 54.72 and 54.77 ( $\text{N}(\text{CH}_3)_3$ ), 58.3 ( $\text{CH}_3\text{O}$ ), 60.4 (d,  $J = 5.0$  Hz,  $\text{OCH}_2\text{CH}_2\text{N}$ ), 66.2 (d,  $J$



85%; TLC (hexane:EtOAc, 1:1 v/v):  $R_f = 0.55$ ;  $^1\text{H NMR}$  (300 MHz,  $\text{CDCl}_3$ ):  $\delta$  1.22–1.42 (m, 14H, H-3' to H-9'), 1.46–1.60 (m, 4H, H-2', H-10'), 1.93 (t,  $J = 2.6$  Hz, 1 H, H-13'), 2.17 (td,  $J = 7.1$  and 2.6 Hz, 2H, H-11'), 3.40–3.49 (m, 3H, H-2, H-1'), 3.46 (s, 3H,  $\text{CH}_3$ ), 3.53 (m, 2H, H-1), 3.63 (dd,  $J = 11.6$  and 4.7 Hz, 1H, H-3a), 3.75 (dd,  $J = 11.6$  and 4.7 Hz, 1H, H-3b);  $^{13}\text{C NMR}$  (75 MHz,  $\text{CDCl}_3$ ):  $\delta$  18.4 (C-11'), 26.0, 28.5, 28.7, 29.1, 29.4 to 29.6 (C-2' to C-10'), 57.7 ( $\text{CH}_3$ ), 62.6 (C-3), 68.0 (C-13'), 70.6 (C-1), 71.9 (C-1'), 79.8 (C-2), 84.8 (C-12'); FT IR (KBr)  $\nu_{\text{max}}$ : 3445, 3312, 2928, 2855, 1465, 1119  $\text{cm}^{-1}$ ;  $\text{ESI}^+$  MS,  $m/z$ : 285.2  $[\text{M} + \text{H}^+]$ , 307.3  $[\text{M} + \text{Na}^+]$ .

1-*O*-[13'-(1'',3'',5'',7''-Tetramethyl-4'',4''-difluoro-4''-bora-3a'',4a''-diazas-indacen-2''-yl)tridec-12'-ynyl]-2-*O*-methyl-*rac*-glycerol (**13**):

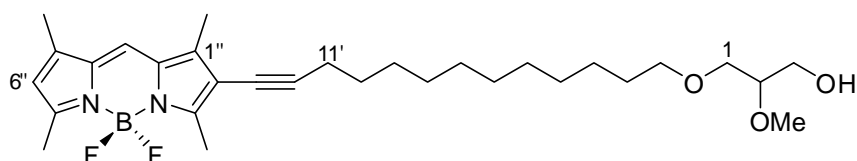

A mixture of 2-iodo-1,3,5,7-tetramethyl-BDP (393 mg, 1.05 mmol),  $\text{PdCl}_2(\text{PPh}_3)_2$  (81 mg, 0.12 mmol),  $\text{CuI}$  (68 mg, 0.36 mmol), phenol (89 mg, 0.95 mmol),  $n\text{Bu}_4\text{NI}$  (1.36 g, 3.68 mmol), DMF (10 mL) and  $i\text{Pr}_2\text{EtN}$  (5 mL) was stirred under argon at room temp. for 5 min. Then, alkyne **12** (300 mg, 1.05 mmol) was added and the mixture was maintained at room temp. for 3 h with stirring. After dilution with EtOAc (40 mL), the work up yielded a residue that was purified by column chromatography (silica gel, hexane:EtOAc, 7:3 v/v). Red waxy solid, yield 401 mg, 72%; TLC (hexane:EtOAc, 1:1 v/v):  $R_f = 0.45$ ;  $^1\text{H NMR}$  (300 MHz,  $\text{CDCl}_3$ ):  $\delta$  1.20–1.48 (m, 14H, H-3' to H-9'), 1.50–1.63 (m, 4H, H-2', H-10'), 2.19, 2.21 (two s, each 3H,  $\text{CH}_3\text{-C1}''$ ,  $\text{CH}_3\text{-C7}''$ ), 2.43 (t,  $J = 6.9$  Hz, 2H, H-11'), 2.49, 2.55 (two s, each 3H,  $\text{CH}_3\text{-C3}''$ ,  $\text{CH}_3\text{-C5}''$ ), 3.38–3.48 (m, 3H, H-2, H-1'), 3.44 (s, 3H,  $\text{CH}_3\text{O}$ ), 3.51 (m, 2H, H-1), 3.61 (dd,  $J = 11.5$  and 5.2 Hz, 1H, H-3a), 3.72 (dd,  $J = 11.5$  and 3.8 Hz, 1H, H-3b), 6.01 (s, 1H, H-6''), 6.98 (s, 1H, H-8'');  $^{13}\text{C NMR}$  (75 MHz,  $\text{CDCl}_3$ ):  $\delta$  10.4, 11.1 ( $\text{CH}_3\text{-C1}''$ ,  $\text{CH}_3\text{-C7}''$ ), 13.3, 14.6 ( $\text{CH}_3\text{-C3}''$ ,  $\text{CH}_3\text{-C5}''$ ), 19.6 (C-11'), 26.0, 28.7, 28.9, 29.0, 29.3–29.5 (C-2' to C-10'), 57.6 ( $\text{CH}_3\text{O}$ ), 62.5 (C-3), 70.5 (C-1), 71.8 (C-1'), 72.3 (C-13'), 79.8 (C-2), 96.5 (C12''), 114.5 (C-2''), 119.3 (C-6''), 120.2 (C-8''), 131.6, 134.0, 140.9, 141.9 (C-1'', C-7'', C-7''a, C-8''a), 157.7, 157.8 (C-3'', C-5''); FT IR (neat)  $\nu_{\text{max}}$ : 3428, 2927, 2850, 1602, 1574, 1471, 1406, 1240, 1194, 1160, 1079, 1000, 894, 807  $\text{cm}^{-1}$ ;  $\text{ESI}^+$  MS,  $m/z$ : 553.3  $[\text{M} + \text{Na}^+]$ , 511.3  $[\text{M} - \text{F}]^+$ , 491.3  $[\text{M} - 2\text{F} + \text{H}]^+$ ; HPLC (reverse phase  $\text{C}_{18}$  column, MeOH: $\text{H}_2\text{O}$ , 9/1 v/v, 1.8  $\text{mL min}^{-1}$ ,  $\lambda_{\text{anal}}$  280, 375 and 529 nm):  $R_t = 6.32$  min (100% purity).

1-*O*-[13'-(1'',3'',5'',7''-Tetramethyl-4'',4''-difluoro-4''-bora-3a'',4a''-diazas-indacen-2''-yl)tridec-12'-ynyl]-2-*O*-methyl-*rac*-glycero-3-phosphocholine (Yn-BDP-ET):

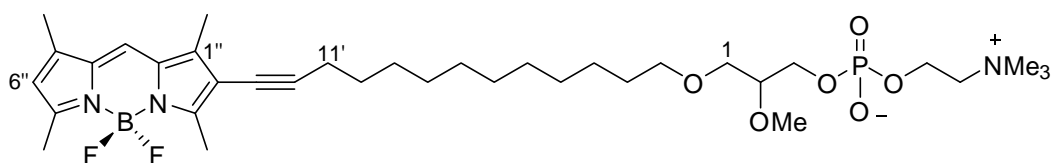

Prepared from **13** (56 mg, 0.10 mmol) and purified under the conditions described above for the synthesis

of analog Et-BDP-ET. Red solid, yield 23 mg, 33%; mp: 124–127 °C; TLC (CHCl<sub>3</sub>:MeOH:H<sub>2</sub>O, 65:25:5 v/v/v): *R<sub>f</sub>* = 0.20; <sup>1</sup>H NMR (300 MHz, CD<sub>3</sub>OD): δ 1.26–1.40 (m, 14H, H-3' to H-9'), 1.46–1.66 (m, 4H, H-2', H-10'), 2.25, 2.26 (two s, each 3H, CH<sub>3</sub>-C1'', CH<sub>3</sub>-C7''), 2.47 (m, 8H, CH<sub>3</sub>-C3'', CH<sub>3</sub>-C5'', H-11'), 3.21 (s, 9H, N(CH<sub>3</sub>)<sub>3</sub>), 3.45 (s, 3H, CH<sub>3</sub>O), 3.41–3.58 (m, 6H, H-1, H-2, H-1'), 3.63 (m, 2H, CH<sub>2</sub>N), 3.85–4.00 (m, 2H, H-3), 4.27 (m, 2H, OCH<sub>2</sub>CH<sub>2</sub>N), 6.14 (s, 1H, CH-6''), 7.36 (s, 1H, CH-8''); <sup>13</sup>C NMR (75 MHz, CD<sub>3</sub>OD): δ 10.6, 11.3 (CH<sub>3</sub>-C1'', CH<sub>3</sub>-C7''), 13.5, 14.8 (CH<sub>3</sub>-C3'', CH<sub>3</sub>-C5''), 20.3 (C-11'), 27.3, 29.9, 30.1, 30.2, 30.7–30.8 (C-2' to C-10'), 54.66, 54.71, 54.77 (N(CH<sub>3</sub>)<sub>3</sub>), 58.3 (CH<sub>3</sub>O), 60.4 (d, *J* = 5.0 Hz, OCH<sub>2</sub>CH<sub>2</sub>N), 66.2 (d, *J* = 5.6 Hz, C-3), 67.5 (br. s, CH<sub>2</sub>N), 71.1 (C-1), 72.7 (C-1'), 73.4 (C-13'), 80.9 (d, *J* = 8.1 Hz, C-2), 97.5 (C-12'), 115.6 (C-2''), 120.7 (C-6''), 122.6 (C-8''), 132.9, 135.8, 142.5, 144.6 (C-1'', C-7'', C-7''a, C-8''a), 157.9, 159.5 (C-3'', C-5''); FT IR (KBr) *v*<sub>max</sub>: 2927, 2854, 1619, 1472, 1406, 1247, 1159, 1068, 974 cm<sup>-1</sup>; ESI<sup>+</sup> MS, *m/z*: 696.3 [M + H<sup>+</sup>], 1391.7 [2M + H<sup>+</sup>]; Analysis (calcd., found for C<sub>35</sub>H<sub>57</sub>BF<sub>2</sub>N<sub>3</sub>O<sub>6</sub>P + 1.5 H<sub>2</sub>O): C (58.17; 58.15), H (8.37, 8.86) N (5.81, 5.83); HPLC (reverse phase C<sub>18</sub> column, MeOH:H<sub>2</sub>O 9:1 v/v + 10 mM H<sub>3</sub>PO<sub>4</sub>, 1.2 mL min<sup>-1</sup>, λ<sub>anal</sub> 280, 375, 529 nm): *R<sub>t</sub>* = 4.29 min (100% purity); UV-Vis (EtOH), λ<sub>max</sub> (ε, M<sup>-1</sup> cm<sup>-1</sup>): 390 nm (9009), 533 nm (56620); UV-Vis (DMSO): λ<sub>max</sub> (ε, M<sup>-1</sup> cm<sup>-1</sup>): 530 nm (42255); emission (corrected) (EtOH): λ<sub>max</sub> 553 nm (Figure S2, panel B), Φ<sub>f</sub> (EtOH) 0.50.

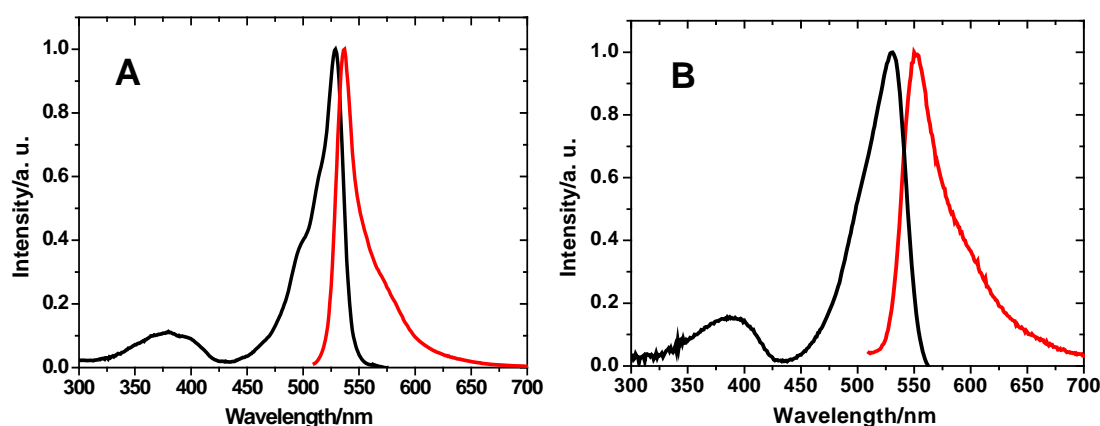

**Figure S2.** Absorption and corrected fluorescence spectra (normalized) of the BDP fluorescent analogues of edelfosine in ethanol solution, 10<sup>-5</sup>–10<sup>-6</sup> M. A) Et-BDP-ET; B) Yn-BDP-ET.

## References

1. Quesada E *et al.* Fluorescent phenylpolyene analogues of the ether phospholipid Edelfosine for the selective labeling of cancer cells. *J Med Chem* 2004; **47**: 5333–5335.
2. Boiadjev SE, Lightner DA. Stable 4*E*-dipyrinones. *Tetrahedron* 1999; **55**: 10871–10886.
3. Wan, C. *et al.* Anthracene-BODIPY Cassettes: Synthesis and Energy Transfer. *Chem Eur J* 2003; **9**: 4430–4441.
4. López-Arbeloa F *et al.* Photophysical and lasing properties of Pyrromethene 567 dye in liquid solution. Environment effects. *Chem Phys* 1998; **236**: 331–341.
5. Parker CA, Res WT. Correction of fluorescence spectra and measurement of fluorescence quantum efficiency. *Analyst* 1960; **85**: 587–593.

6. Jia C, Haines AH. *J. Chem. Soc. Perkin Trans 1* 1993; 2521–2523.
7. Takasu M, Naruse Y, Yamamoto H. A convenient procedure for the regioselective monoprotection of 1,n-diols. *Tetrahedron Lett* 1988; **29**: 1947–1950.
8. Mori M *et al.* Palladium-catalyzed carbonylation. A new synthesis of  $\alpha$ -methylene  $\gamma$ -,  $\delta$ -, and  $\epsilon$ -lactams and -lactones including bicyclic lactams of pyrrolizidine and indolizidine skeletons. *J Org Chem* 1983; **48**: 4058–4067.
9. (a) Schmuck C, Rupprecht D. The synthesis of highly functionalized pyrroles: a challenge in regioselectivity and chemical reactivity. *Synthesis* 2007; 3095–3110; (b) Bullock E, Johnson AW, Markham E, Shaw KB. A synthesis of coproporphyrin III. *J Chem Soc* 1958; 1430–1440.
10. Mackman RL *et al.* Haem  $d_1$ : development of new coupling procedure leading to the synthesis of isobacteriochlorins. *J Chem Soc Perkin Trans. 1* 1997; 2111–2122.
11. Hornillos V *et al.* Synthesis of BODIPY-labeled alkylphosphocholines with leishmanicidal activity, as fluorescent analogues of miltefosine. *Bioorg Med Chem Lett* 2008; **18**: 6336–6339.
12. Hornillos V *et al.* Synthesis of 16-mercaptohexadecylphosphocholine, a miltefosine analog with leishmanicidal activity. *Bioorg Med Chem Lett* 2006; **16**: 5190–5193.
13. Oppolzer W, Radinov RN, El-Sayed E. Catalytic asymmetric synthesis of macrocyclic (*E*)-allylic alcohols from  $\omega$ -alkynals via intramolecular 1-alkenylzinc/aldehyde additions. *J Org Chem* 2001; **66**: 4766–4770.
14. Chinchilla R, Nájera C. The Sonogashira reaction: a booming methodology in synthetic organic chemistry. *Chem Rev* 2007; **107**: 874–922.
